# Supplementary material for: A digital 3D reference atlas reveals cellular growth patterns shaping the Arabidopsis ovule
Source: eLife. 2021 Jan 6;10:e63262. doi: 10.7554/eLife.63262 (PMC7787667; doi:10.7554/eLife.63262)
Supplement: Appendix 1—figure 1—source data 1. [file elife-63262-app1-fig1-data1.xlsx]

## Sheet: Fig_S1
Col-0 nucellus					Col-0 embryo sac				Col-0 central region/chalaza					Col-0 funiculus
Ovule_id	Stage	Total_cells	Tissue _volume (µm³)		Ovule_id	Stage	Tissue _volume (µm³)		Ovule_id	Stage	Total_cells	Tissue _volume (µm³)		Ovule_id	Stage	Total_cells	Tissue _volume (µm³)
603_A	2-III	47	4635.6		420	3-I	3122.25		603_A	2-III	42	5023.51		603_A	2-III	159	21706.9
473_A	2-III	46	5219.85		439	3-I	2445.97		473_A	2-III	39	4305.37		473_A	2-III	176	22713.6
294_E	2-III	57	5815.24		440	3-I	1112.07		294_E	2-III	25	2242.72		294_E	2-III	135	15982.8
406	2-III	62	6604.08		451	3-I	858.114		406	2-III	35	4231.62		406	2-III	157	18373.5
603_C	2-III	37	4253.49		515	3-I	1755.79		603_C	2-III	41	4548.05		603_C	2-III	142	19096.5
416_A	2-III	55	7388.91		543	3-I	641.215		416_A	2-III	35	4418.12		416_A	2-III	177	25609.5
474_B	2-III	56	5753.96		606	3-I	793.444		474_B	2-III	39	4559.87		474_B	2-III	197	26219.2
416_B	2-III	59	6836.79		608	3-I	3405.94		416_B	2-III	29	3587.53		416_B	2-III	171	22847.1
801_F	2-III	46	4624.52		617_B	3-I	1562.66		801_F	2-III	36	3437.77		801_F	2-III	112	11537.1
294_D	2-III	68	6686.65		407_A	3-I	1562.66		294_D	2-III	29	3229.04		294_D	2-III	111	14590.3
404	2-IV	66	6726.58		403	3-II	3155.08		404	2-IV	59	6663.98		404	2-IV	223	28256.9
405_A	2-IV	66	7262.98		507_B	3-II	2831.35		405_A	2-IV	66	8227.75		405_A	2-IV	190	24175.8
405_B	2-IV	69	7570.81		508	3-II	2532.38		405_B	2-IV	66	7760.89		405_B	2-IV	190	23557.4
449	2-IV	54	6358.75		526	3-II	4824.02		449	2-IV	73	8168.06		449	2-IV	204	23350.7
450	2-IV	60	7992.44		412	3-II	3312.3		450	2-IV	65	8282.04		450	2-IV	191	23660
462	2-IV	55	6791.46		434	3-II	4219.43		462	2-IV	54	6560.78		462	2-IV	247	29534.9
474_A	2-IV	59	6618.07		486_A	3-II	965.304		474_A	2-IV	54	5866.59		474_A	2-IV	220	25371.7
473_C	2-IV	51	5225.87		509	3-II	2605.71		473_C	2-IV	46	5105.55		473_C	2-IV	179	20655.4
474_C	2-IV	50	5891.91		522	3-II	2014.08		474_C	2-IV	46	4885.46		474_C	2-IV	213	26142.2
474_E	2-IV	64	6906.79		527	3-II	4650.51		474_E	2-IV	47	6006.23		474_E	2-IV	245	29760
419	2-V	67	9288.12		428	3-III	3161.99		419	2-V	89	13607.8		419	2-V	329	40366.3
422	2-V	78	6976.21		429	3-III	2654.95		422	2-V	96	13112.7		422	2-V	346	37741.3
424_B	2-V	70	6025.63		495_A	3-III	8245.6		424_B	2-V	78	11405.1		424_B	2-V	265	29507.6
425	2-V	86	9229.05		495_B	3-III	5627.47		425	2-V	88	13892.6		425	2-V	357	46411
467	2-V	52	5837.23		507_A	3-III	4155.07		467	2-V	86	11783.5		467	2-V	308	33583.6
472_A	2-V	61	6721.51		528	3-III	4211.46		472_A	2-V	78	10813.6		472_A	2-V	283	38992.1
472_B	2-V	65	6243.23		616	3-III	4798.25		472_B	2-V	81	10867.8		472_B	2-V	337	39501.6
472_C	2-V	61	6697.75		430	3-III	3026.95		472_C	2-V	86	11565.8		472_C	2-V	309	35738.1
490_B	2-V	47	5593.14		436	3-III	3296.14		490_B	2-V	91	11338.9		490_B	2-V	285	28287.5
490_C	2-V	67	6355.96		611	3-III	3014.54		490_C	2-V	71	9077.68		490_C	2-V	266	29980.5
420	3-I	74	7031.83		614	3-III	2298.05		420	3-I	107	17441.6		420	3-I	402	49046.5
439	3-I	63	6606.49		410	3-IV	6808.03		439	3-I	125	19826		439	3-I	383	39133.7
440	3-I	76	7251.6		491	3-IV	6079.29		440	3-I	132	21545.4		440	3-I	388	44809.3
451	3-I	60	5905.17		494	3-IV	3256.66		451	3-I	65	9747.96		451	3-I	359	40549.7
515	3-I	74	7253.1		512	3-IV	2742.1		515	3-I	117	20903		515	3-I	354	43906.3
543	3-I	91	8998.82		513_A	3-IV	8061.87		543	3-I	149	24850.8		543	3-I	388	49556.7
606	3-I	62	6880.67		514	3-IV	3516.59		606	3-I	145	19442.4		606	3-I	424	45173.1
608	3-I	40	4785		517	3-IV	7802.19		608	3-I	108	15907.7		608	3-I	349	34070.5
617_B	3-I	69	8568.39		520	3-IV	3933.2		617_B	3-I	141	24689.9		617_B	3-I	407	47912.7
407_A	3-I	60	6467.6		539	3-IV	4226.18		407_A	3-I	100	17826.7		407_A	3-I	470	52205.5
403	3-II	52	7205.88		610	3-IV	8568.18		403	3-II	172	28336.9		403	3-II	442	55753.6
507_B	3-II	70	7695.91		444	3-V	14942.4		507_B	3-II	187	32628		507_B	3-II	421	55621.3
508	3-II	68	7418.4		464	3-V	14942.4		508	3-II	149	27987.1		508	3-II	487	62540.7
526	3-II	35	6154.24		492	3-V	9844.9		526	3-II	159	30044.5		526	3-II	514	62114.3
412	3-II	44	6591.05		525	3-V	10377		412	3-II	158	31760.4		412	3-II	571	73355.7
434	3-II	39	5533.25		534	3-V	8684.02		434	3-II	175	29572.2		434	3-II	493	61572.4
486_A	3-II	76	7941		535	3-V	10446.8		486_A	3-II	138	24144.9		486_A	3-II	421	49860.4
509	3-II	64	7945.12		540	3-V	10325.7		509	3-II	134	26878.9		509	3-II	497	69256.3
522	3-II	65	7028.19		541	3-V	8678.91		522	3-II	160	26171.4		522	3-II	401	46386.6
527	3-II	47	5291.34		542	3-V	8359.61		527	3-II	149	29377.3		527	3-II	524	64512.4
428	3-III	70	7976.7		612	3-V	12076.8		428	3-III	173	30386.9		428	3-III	492	61812
429	3-III	91	9181.39		613	3-V	6656.18		429	3-III	170	28140.3		429	3-III	554	63071.6
495_A	3-III	64	9099.31		557	3-VI	30744.5		495_A	3-III	192	38489.5		495_A	3-III	507	59906.4
495_B	3-III	79	9294.04		559	3-VI	17788.2		495_B	3-III	178	34205.8		495_B	3-III	593	80286.5
507_A	3-III	74	7332.38		561	3-VI	22274.1		507_A	3-III	146	27774.5		507_A	3-III	439	52814
528	3-III	65	9102.39		751	3-VI	21803.9		528	3-III	193	36941.3		528	3-III	494	57487.4
616	3-III	28	5459.01		752	3-VI	11992.4		616	3-III	148	30186.7		616	3-III	408	41687.3
430	3-III	59	7621.51		753	3-VI	19974.8		430	3-III	151	28019.1		430	3-III	494	57393.8
436	3-III	47	7429.7		754	3-VI	8432.2		436	3-III	161	29854.7		436	3-III	464	62963.9
611	3-III	70	8794		755	3-VI	9268.89		611	3-III	223	36441		611	3-III	521	65959
614	3-III	61	6002.09		756	3-VI	13434.9		614	3-III	159	22865.3		614	3-III	492	50569.5
410	3-IV	74	9505.24		555	3-VI	20862.9		410	3-IV	176	34516.3		410	3-IV	495	65062.1
491	3-IV	91	10488.8						491	3-IV	192	35297.9		491	3-IV	601	101448
494	3-IV	91	13826.9						494	3-IV	181	31984.3		494	3-IV	576	85595.1
512	3-IV	70	8164.64						512	3-IV	162	30102.6		512	3-IV	403	54798.3
513_A	3-IV	64	7777.66						513_A	3-IV	228	36777.5		513_A	3-IV	442	56405.8
514	3-IV	75	10767.7						514	3-IV	209	41059.4		514	3-IV	636	95065.4
517	3-IV	80	8576.71						517	3-IV	173	34560.3		517	3-IV	420	56759.4
520	3-IV	84	10495.6						520	3-IV	219	43799.2		520	3-IV	526	74653
539	3-IV	90	10409.8						539	3-IV	192	40828.9		539	3-IV	511	75240.1
610	3-IV	54	6895.11						610	3-IV	163	26506.5		610	3-IV	476	57271
444	3-V	55	7375.46						444	3-V	191	33542.6		444	3-V	507	74507.6
464	3-V	55	7375.46						464	3-V	191	33542.6		464	3-V	509	74825.5
492	3-V	83	9851.76						492	3-V	144	24952.9		492	3-V	539	64436.2
525	3-V	97	13674.6						525	3-V	251	44071		525	3-V	479	67814.2
534	3-V	56	11660						534	3-V	187	35529.5		534	3-V	467	62891.1
535	3-V	106	14916.6						535	3-V	188	38522.7		535	3-V	551	77517.1
540	3-V	86	15033.6						540	3-V	236	46631.1		540	3-V	552	81278
541	3-V	91	11695.1						541	3-V	231	47754.4		541	3-V	561	85472
542	3-V	100	14540.6						542	3-V	237	45606.3		542	3-V	496	64182.1
612	3-V	52	12513.6						612	3-V	214	41042.7		612	3-V	475	68741.8
613	3-V	70	10920.2						613	3-V	231	39184.2		613	3-V	439	59355.5
557	3-VI	46	10634.7						557	3-VI	236	61058.6		557	3-VI	502	76893
559	3-VI	75	12705.4						559	3-VI	235	53086.2		559	3-VI	544	80464
561	3-VI	90	12393.5						561	3-VI	293	61725.1		561	3-VI	536	83918.3
751	3-VI	81	11477						751	3-VI	333	61791.3		751	3-VI	681	97625.1
752	3-VI	88	14158.4						752	3-VI	280	50432.8		752	3-VI	504	74524.4
753	3-VI	109	14608.3						753	3-VI	262	44444.5		753	3-VI	609	86334.6
754	3-VI	95	15381						754	3-VI	263	50623.8		754	3-VI	471	68778.1
755	3-VI	88	10716.9						755	3-VI	263	44887.5		755	3-VI	441	57317.9
756	3-VI	84	11723.3						756	3-VI	232	41813.7		756	3-VI	531	71389.6
555	3-VI	103	15721.5						555	3-VI	288	61972.8		555	3-VI	511	72372.6
