# Supplementary material for: A digital 3D reference atlas reveals cellular growth patterns shaping the Arabidopsis ovule
Source: eLife. 2021 Jan 6;10:e63262. doi: 10.7554/eLife.63262 (PMC7787667; doi:10.7554/eLife.63262)
Supplement: Appendix 1—figure 2—source data 1. [file elife-63262-app1-fig2-data1.xlsx]

## Sheet: Fig_S2
Col-0 outer integument					Col-0 inner integument
Ovule_id	Stage	Total_cells	Tissue _volume (µm³)		Ovule_id	Stage	Total_cells	Tissue _volume (µm³)
603_A	2-III	68	10320.1		603_A	2-III	17	2358.82
473_A	2-III	59	8500.96		473_A	2-III	29	3480.78
294_E	2-III	41	5188.35		294_E	2-III	23	2768.09
406	2-III	58	11347.6		406	2-III	35	4388.25
603_C	2-III	68	10549		603_C	2-III	21	2892.38
416_A	2-III	33	4771.25		416_A	2-III	19	2690.16
474_B	2-III	44	7554.55		474_B	2-III	26	3867.91
416_B	2-III	57	7895.2		416_B	2-III	23	3025.13
801_F	2-III	46	4798.29		801_F	2-III	18	1935.29
294_D	2-III	64	8598.2		294_D	2-III	24	2622.49
404	2-IV	75	15050.9		404	2-IV	47	5829.42
405_A	2-IV	65	13504.9		405_A	2-IV	46	5891.32
405_B	2-IV	63	14267		405_B	2-IV	51	6961.86
449	2-IV	79	16197.6		449	2-IV	56	6780.82
450	2-IV	74	18327.4		450	2-IV	55	7851.14
462	2-IV	79	17263.3		462	2-IV	54	6127.96
474_A	2-IV	53	10955.1		474_A	2-IV	47	6476.85
473_C	2-IV	70	12002.9		473_C	2-IV	39	4955.64
474_C	2-IV	49	9634.02		474_C	2-IV	40	5338.89
474_E	2-IV	59	13546		474_E	2-IV	46	6191.64
419	2-V	171	53735.9		419	2-V	96	12984.9
422	2-V	168	41457.4		422	2-V	89	9775.59
424_B	2-V	136	36653.9		424_B	2-V	78	9977.58
425	2-V	129	41856.4		425	2-V	97	12492.9
467	2-V	132	36560.4		467	2-V	86	10416.5
472_A	2-V	90	24223.6		472_A	2-V	69	9297.78
472_B	2-V	119	34427.4		472_B	2-V	76	9530.06
472_C	2-V	125	37319.2		472_C	2-V	76	9401.26
490_B	2-V	138	36564.1		490_B	2-V	82	9528.11
490_C	2-V	102	23894.4		490_C	2-V	76	8734.77
420	3-I	204	82024.5		420	3-I	136	19159.7
439	3-I	243	87985.4		439	3-I	120	19186
440	3-I	270	100632		440	3-I	154	23873.3
451	3-I	163	45955		451	3-I	119	14991.9
515	3-I	210	89186.9		515	3-I	133	18981.7
543	3-I	276	107475		543	3-I	133	22056.4
606	3-I	267	88891.1		606	3-I	143	22158.6
608	3-I	240	91994.5		608	3-I	126	21359.4
617_B	3-I	273	103603		617_B	3-I	162	28314.1
407_A	3-I	213	78863.3		407_A	3-I	99	14579.3
403	3-II	289	143211		403	3-II	236	49637.2
507_B	3-II	296	138347		507_B	3-II	216	44661.9
508	3-II	308	132804		508	3-II	166	34023.5
526	3-II	296	142630		526	3-II	200	44473.1
412	3-II	300	130756		412	3-II	207	42925.8
434	3-II	278	120343		434	3-II	179	37358.3
486_A	3-II	275	120395		486_A	3-II	178	32519.1
509	3-II	298	146208		509	3-II	188	38742.1
522	3-II	282	105831		522	3-II	167	33549.8
527	3-II	269	135664		527	3-II	210	41105.6
428	3-III	296	134378		428	3-III	188	43780.2
429	3-III	312	137216		429	3-III	209	44231.4
495_A	3-III	364	168103		495_A	3-III	249	58978.6
495_B	3-III	346	166223		495_B	3-III	273	62698.2
507_A	3-III	340	137490		507_A	3-III	236	47394.4
528	3-III	322	148976		528	3-III	213	49842.7
616	3-III	332	140851		616	3-III	211	44950.1
430	3-III	304	122716		430	3-III	200	39530.7
436	3-III	335	136829		436	3-III	198	37196.4
611	3-III	322	137197		611	3-III	205	46156.5
614	3-III	297	104097		614	3-III	203	37320.6
410	3-IV	330	164213		410	3-IV	239	53561.4
491	3-IV	347	158199		491	3-IV	276	54717.2
494	3-IV	298	164586		494	3-IV	238	55269.3
512	3-IV	293	137783		512	3-IV	228	51742.4
513_A	3-IV	335	145921		513_A	3-IV	223	52054.2
514	3-IV	361	165812		514	3-IV	259	59788.9
517	3-IV	342	141785		517	3-IV	241	54154.8
520	3-IV	382	174751		520	3-IV	293	67093.9
539	3-IV	385	177306		539	3-IV	307	70382.1
610	3-IV	373	152683		610	3-IV	224	53107.8
444	3-V	391	186700		444	3-V	306	64693.9
464	3-V	393	186141		464	3-V	305	64277.8
492	3-V	352	164135		492	3-V	275	60084.2
525	3-V	465	193577		525	3-V	373	80583.9
534	3-V	377	170512		534	3-V	300	66009.4
535	3-V	496	197579		535	3-V	392	83859.1
540	3-V	484	201901		540	3-V	385	85693.6
541	3-V	483	189498		541	3-V	354	83072.5
542	3-V	497	202600		542	3-V	386	90993.5
612	3-V	501	179499		612	3-V	410	86638.8
613	3-V	399	170529		613	3-V	293	68752
557	3-VI	629	261609		557	3-VI	533	129028
559	3-VI	465	211731		559	3-VI	375	96356.6
561	3-VI	548	256527		561	3-VI	457	115541
751	3-VI	554	223462		751	3-VI	476	107946
752	3-VI	521	209845		752	3-VI	415	95476.3
753	3-VI	616	219324		753	3-VI	520	108477
754	3-VI	512	218679		754	3-VI	381	95427.5
755	3-VI	493	180696		755	3-VI	416	85605.5
756	3-VI	522	185510		756	3-VI	392	82574.6
555	3-VI	656	302533		555	3-VI	574	142649
