# Supplementary material for: A digital 3D reference atlas reveals cellular growth patterns shaping the Arabidopsis ovule
Source: eLife. 2021 Jan 6;10:e63262. doi: 10.7554/eLife.63262 (PMC7787667; doi:10.7554/eLife.63262)
Supplement: Figure 1—source data 1. [file elife-63262-fig1-data1.xlsx]

## Sheet: Fig1
ovule stage
	1-I	1-II	2-I	2-II	2-III	2-IV	2-V	3-I	3-II	3-III	3-IV	3-V	3-VI
Ovule IDs	786_E	397_C	765	769	406	404	419	420	403	428	410	444	555		158 High quality dataset
	786_C	397_A	772_B	796	294_D	449	422	439	412	429	491	464	557		Additional dataset
	787_B	397_B	764_A	763_A	294_E	450	425	440	434	430	494	492	559
	787_A	784_E	772_A	763_B	416_A	462	467	451	508	436	512	525	561
	784_A	396_C	589_B	764_B	416_B	405_A	424_B	515	509	528	514	534	751
	784_D	783_B	766_A	764_C	473_A	405_B	472_A	543	522	611	517	535	752
	785_A	783_C	589_A	794_A	474_B	473_C	472_B	606	526	614	520	540	753
	785_B	783_D	760_B	794_B	603_A	474_A	472_C	608	527	616	539	541	754
	785_C	783_E	761_A	794_C	603_C	474_C	490_B	407_A	486_A	495_A	610	542	755
	786_A	396_D	760_A	801_A	801_F	474_E	490_C	617_B	507_B	495_B	513_A	612	756
	784_B	784_C	762_A	801_B						507_A		613
	786_D	290_D	226_E	801_C
	783_A	396_B	760_C	801_D
	786_B	782_A	598_G
	785_D	601_A	226_C
	780_C	396_A	593_G
	780_A	601_G	393_C
	787_E	778_B	591_D
	786_F	601_B	598_A
	787_D	781_A	598_C
	782_B	290_C	760_D
	786_G	601_F	393_D
	787_C	601_C	593_E
		778_A	294_A
		601_E	593_C
		290_A	593_F
		394_B	591_C
		771_A	226_F
		394_A	589_C
		781_C	593_A
		779_E	762_B
		598_H	593_H
		772_C	766_C
		778_D	590_D
		780_B	226_D
		396_E	761_B
		396_F	593_B
		397_D	294_G
		779_A	502
		782_C	226_A
		394_D	226_B
		778_C	393_B
		779_B	591_A
		779_C	766_B
		291_D	591_B
		601_D	593_D
		779_D	500
		598_F	762_C
		600_B	589_D
		781_B
		223
		290_E
		290_G
		291_A
		290_F
		598_I
		291_B
		600_A
		291_C
		393_E
		598_E
		394_C
		393_A
		598_D
		290_B
		598_B
