# Supplementary material for: A digital 3D reference atlas reveals cellular growth patterns shaping the Arabidopsis ovule
Source: eLife. 2021 Jan 6;10:e63262. doi: 10.7554/eLife.63262 (PMC7787667; doi:10.7554/eLife.63262)
Supplement: Figure 2—source data 1. [file elife-63262-fig2-data1.xlsx]

## Sheet: Fig_2
Ovule_id	Stage	Total_cells	Total_volume (µm³)
785_A	1-I	37	5237.27
785_B	1-I	39	5238.57
785_C	1-I	39	5153.34
786_A	1-I	41	4603.34
786_B	1-I	47	5767.96
786_C	1-I	26	3138.8
786_D	1-I	44	6097.94
786_E	1-I	28	3424.45
787_A	1-I	35	3788.35
787_B	1-I	34	3899.36
783_A	1-I	46	5273.12
784_A	1-I	38	5118.47
784_B	1-I	40	5063.34
784_D	1-I	38	5585.53
782	1-II	63	8803.21
783_B	1-II	54	6444.81
783_C	1-II	59	7697.76
783_D	1-II	61	8213.49
783_E	1-II	60	7679.08
781_A	1-II	84	12316.3
778_A	1-II	87	12184.6
778_B	1-II	81	11333.2
601_A	1-II	70	9122.17
601_B	1-II	81	10736.3
601_C	1-II	89	10658.2
601_E	1-II	92	11550.1
601_F	1-II	86	11050.5
601_G	1-II	78	11486.4
396_A	1-II	69	8462.24
396_B	1-II	55	6327.44
396_C	1-II	49	5574.29
396_D	1-II	53	6978.88
397_A	1-II	54	7486.24
397_B	1-II	55	7562.85
397_C	1-II	51	6842.05
784_C	1-II	62	8811.19
784_E	1-II	57	6919.96
771	1-II	111	19838.2
394_B	1-II	105	12591
290_A	1-II	94	12425.5
290_C	1-II	86	10522.5
290_D	1-II	65	9585.61
761	2-I	208	28150.7
766	2-I	176	28319.4
589_A	2-I	195	26152.8
589_B	2-I	170	23490.9
760_A	2-I	209	28322.5
760_B	2-I	202	25177.8
762_A	2-I	215	30141.2
772_A	2-I	161	23763.7
772_B	2-I	137	21027.9
765	2-I	127	19709.9
764_A	2-I	144	20478.2
764_B	2-II	243	35478
764_C	2-II	199	30157.3
769	2-II	237	34947.7
763_A	2-II	219	31159.2
763_B	2-II	240	31072.2
794_A	2-II	243	26583.6
794_B	2-II	238	25693.1
794_C	2-II	259	27238.3
796	2-II	206	23497.6
801_A	2-II	192	19390.1
801_B	2-II	218	22073.7
801_C	2-II	176	18823.1
801_D	2-II	198	21231.7
603_A	2-III	333	44044.9
473_A	2-III	349	44220.5
294_E	2-III	281	31997.2
406	2-III	347	44945.1
603_C	2-III	309	41339.5
416_A	2-III	319	44878
474_B	2-III	362	47955.5
416_B	2-III	339	44191.7
801_F	2-III	258	26333
294_D	2-III	296	35726.7
404	2-IV	470	62527.7
405_A	2-IV	433	59062.7
405_B	2-IV	439	60118
449	2-IV	466	60856
450	2-IV	445	66113
462	2-IV	489	66278.4
474_A	2-IV	433	55288.3
473_C	2-IV	385	47945.4
474_C	2-IV	398	51892.4
474_E	2-IV	461	62410.6
419	2-V	752	129983
422	2-V	777	109063
424_B	2-V	627	93569.7
425	2-V	757	123882
467	2-V	664	98181.3
472_A	2-V	581	90048.5
472_B	2-V	678	100570
472_C	2-V	657	100722
490_B	2-V	643	91311.8
490_C	2-V	582	78043.3
420	3-I	924	177826
439	3-I	937	175184
440	3-I	1021	199223
451	3-I	767	118008
515	3-I	891	181987
543	3-I	1038	213579
606	3-I	1042	183339
608	3-I	864	171523
617_B	3-I	1053	214651
407_A	3-I	943	171505
403	3-II	1193	287300
507_B	3-II	1191	281786
508	3-II	1184	267306
526	3-II	1207	290240
412	3-II	1281	288701
434	3-II	1167	258598
486_A	3-II	1090	235825
509	3-II	1184	291636
522	3-II	1078	220981
527	3-II	1200	280601
428	3-III	1220	281495
429	3-III	1337	284496
495_A	3-III	1377	342822
495_B	3-III	1470	358335
507_A	3-III	1236	276960
528	3-III	1288	306561
616	3-III	1128	267933
430	3-III	1211	258308
436	3-III	1209	277570
611	3-III	1343	297562
614	3-III	1214	223152
410	3-IV	1315	333666
491	3-IV	1508	366231
494	3-IV	1385	354518
512	3-IV	1157	285333
513_A	3-IV	1293	306998
514	3-IV	1541	376010
517	3-IV	1257	303638
520	3-IV	1505	374726
539	3-IV	1486	378394
610	3-IV	1291	305031
444	3-V	1451	381762
464	3-V	1454	381104
492	3-V	1395	333305
525	3-V	1671	410098
534	3-V	1394	355286
535	3-V	1734	422841
540	3-V	1744	440863
541	3-V	1727	426171
542	3-V	1717	426282
612	3-V	1653	400513
613	3-V	1435	355397
557	3-VI	1947	569968
559	3-VI	1698	472132
561	3-VI	1926	552379
751	3-VI	2128	524106
752	3-VI	1812	456429
753	3-VI	2120	493163
754	3-VI	1729	457321
755	3-VI	1708	388492
756	3-VI	1765	406447
555	3-VI	2135	616112
