# Supplementary material for: A digital 3D reference atlas reveals cellular growth patterns shaping the Arabidopsis ovule
Source: eLife. 2021 Jan 6;10:e63262. doi: 10.7554/eLife.63262 (PMC7787667; doi:10.7554/eLife.63262)
Supplement: Figure 3—source data 1. [file elife-63262-fig3-data1.xlsx]

## Sheet: Fig_3
0.33 0.38 0.38 0.44 0.45 0.49 0.51 0.57 0.61 0.62 0.62 0.66 0.68 0.69 0.71 0.72 0.75 0.82 0.83 0.88 0.94 0.95 0.95 0.98 1.1 1.13 1.15 1.18 1.2 1.2 1.2 1.21 1.22 1.28 1.3 1.31 1.32 1.35 1.46 1.49 1.55 1.55 1.6 1.61 1.62 1.63 1.65 1.71 1.72 1.75 1.79 1.82 1.84 1.9 1.96 1.97 2.1 2.1 2.1 2.18 2.2 2.27 2.3 2.32
Stage	Start stage at	x (time)	End stage at	x (time)	Hours
	pistil length (mm)		pistil length (mm)
1-I	0.33	3.1063	0.44	18.7974	15.6911
1-II	0.44	18.688	0.57	34.6903	16.0023
2-I	0.57	34.4884	0.66	44.4137	9.92531
2-II	0.66	44.1552	0.785	56.5571	12.4019
2-III	0.785	56.228	0.94	69.865	13.637
2-IV	0.94	69.4584	1.1	82.0084	12.55
2-V	1.1	81.5312	1.25	92.2247	10.6935
3-I	1.25	91.688	1.6	112.737	21.0489
3-II / 3-III	1.6	112.081	1.71	118.423	6.34224
3-IV	1.71	117.734	1.825	124.05	6.31643
3-V	1.825	123.328	2.235	141.931	18.6025
3-VI	2.235	141.105	2.3	144.501	3.3962
Y=Y0+a*(-1+exp(x/b))
	Best fitting values
Y0	0.32
a	0.66
b	103.1
x	time	derived from the formula
y	pistil length (mm)
