# Supplementary material for: A digital 3D reference atlas reveals cellular growth patterns shaping the Arabidopsis ovule
Source: eLife. 2021 Jan 6;10:e63262. doi: 10.7554/eLife.63262 (PMC7787667; doi:10.7554/eLife.63262)
Supplement: Figure 4—source data 1. [file elife-63262-fig4-data1.xlsx]

## Sheet: Fig_4A
	Relative growth	Relative proliferation
1-I→1-II	2.2475	2.17091
1-II→2-I	2.14621	2.15975
2-I→2-II	1.10004	1.2119
2-II→2-III	1.51815	1.44731
2-III→2-IV	1.46067	1.38396
2-IV→2-V	1.71374	1.52025
2-V→3-I	1.77947	1.41113
3-I→3-II	1.49598	1.24209
3-II→3-III	1.09215	1.08866
3-III→3-IV	1.14651	1.07169
3-IV→3-V	1.16401	1.14976
3-V→3-VI	1.25304	1.20086

## Sheet: Fig_4B
													Exponential growth constant k (y = e^kx)
Growth ratio			Proliferation ratio			Stage	Time (h)		Time (h)				Growth	Proliferation
1-I->1-II	1.2475		1-I->1-II	1.17091		1-I	14.6		1-I->1-II	15.15			0.0534535	0.0511647
1-II->2-I	1.14621		1-II->2-I	1.15975		1-II	15.7		1-II->2-I	13			0.0587465	0.0592302
2-I->2-II	0.100041		2-I->2-II	0.211901		2-I	10.3		2-I->2-II	10.9			0.0087475	0.0176321
2-II->2-III	0.518147		2-II->2-III	0.447315		2-II	11.5		2-II->2-III	12.15			0.0343613	0.0304288
2-III->2-IV	0.460665		2-III->2-IV	0.383965		2-III	12.8		2-III->2-IV	12.5			0.0303113	0.0259962
2-IV->2-V	0.713735		2-IV->2-V	0.520253		2-IV	12.2		2-IV->2-V	11.9			0.0452668	0.0351998
2-V->3-I	0.779466		2-V->3-I	0.411134		2-V	11.6		2-V->3-I	15.2			0.0379154	0.0226575
3-I->3-II / 3-III	0.549196		3-I->3-II / 3-III	0.296363		3-I	18.8		3-I->3-II / 3-III	12.15			0.0360277	0.0213632
3-II / 3-III->3-IV	0.209142		3-II / 3-III->3-IV	0.117863		3-II / 3-III	5.5		3-II / 3-III->3-IV	5.5			0.0345293	0.0202579
3-IV->3-V	0.164014		3-IV->3-V	0.14976		3-IV	5.5		3-IV->3-V	12.05			0.0126037	0.0115812
3-V->3-VI	0.253041		3-V->3-VI	0.200856		3-V	18.6		3-V->3-VI	10.8			0.0208864	0.0169476
						3-IV	3
													1	1
													1.09902	1.15764
													0.163647	0.344614
													0.642827	0.594723
													0.56706	0.508088
													0.846845	0.687969
													0.709315	0.442834
													0.674	0.417538
													0.645969	0.395935
													0.235788	0.226351
													0.39074	0.331237

## Sheet: Fig_4C-F
Stage	Mean Total volume (µm³)	L1 (µm³)	L2 (µm³)	L3 (µm³)		Ratio volume increase	Tot volume	L1	L2	L3		Relative growth	L1	L2	L3
1-I	4813.56	2872.09	1654.62	286.855		1-I->1-II	2.01765	1.77029	2.11835	3.91352		1-I->1-II	0.8774	1.04991	1.93964
1-II	9712.08	5084.42	3505.05	1122.62		1-II->2-I	2.57163	2.64425	2.51718	2.41279		1-II->2-I	1.02824	0.978824	0.938231
2-I	24975.9	13444.5	8822.82	2708.63		2-I->2-II	1.06979	1.09954	1.04258	1.01073		2-I->2-II	1.02781	0.974565	0.944797
2-II	26718.9	14782.7	9198.47	2737.7		2-II->2-III	1.51815	---	---	---		2-II->2-III	---	---	---
2-III	40563.2	---	---	---
Stage	Mean Total cells	L1	L2	L3		Ratio cell increase	Tot cells	L1	L2	L3		Relative Proliferation	L1	L2	L3
1-I	38	25.0714	11	1.92857		1-I->1-II	1.91093	1.69362	2.04895	3.94872		1-I->1-II	0.886281	1.07223	2.06638
1-II	72.6154	42.4615	22.5385	7.61538		1-II->2-I	2.43374	2.43643	2.46447	2.32782		1-II->2-I	1.0011	1.01263	0.956478
2-I	176.727	103.455	55.5455	17.7273		2-I->2-II	1.24834	1.27518	1.20899	1.21499		2-I->2-II	1.0215	0.968479	0.973286
2-II	220.615	131.923	67.1538	21.5385		2-II->2-III	1.44732	---	---	---		2-II->2-III	---	---	---
2-III	319.3	---	---	---

## Sheet: Fig_4G-J
Stage	Mean total volume (µm³)	Mean OI volume (µm³)	Mean II volume (µm³)	Mean Chalaza volume (µm³)	Mean Nucellus volume (µm³)	Mean Funiculus volume (µm³)	Mean Embryosac volume (µm³)		Ratio volume increase	Tot volume	OI	II	CH	N	F	ES		Relative growth	OI	II	CH	N	F	ES
2-III	40563.2	7952.35	3002.93	3958.36	5781.91	19867.7	0		2-III->2-IV	1.46066	1.7699	2.07815	1.70594	1.16477	1.2808	0		2-III->2-IV	1.21171	1.42275	1.16792	0.797421	0.876861	0
2-IV	59249.3	14074.9	6240.55	6752.73	6734.57	25446.5	0		2-IV->2-V	1.71373	2.60529	1.63671	1.73952	1.02409	1.41516	0		2-IV->2-V	1.52024	0.955052	1.01505	0.597576	0.825778	0
2-V	101538	36669.3	10214	11746.5	6896.78	36011	0		2-V->3-I	1.77947	2.39059	2.00374	1.63607	1.01132	1.23952	0		2-V->3-I	1.34343	1.12603	0.919415	0.568329	0.69657	0
3-I	180683	87661.1	20466.1	19218.1	6974.87	44636.4	1726.01		3-I->3-II	1.49598	1.50145	1.94955	1.49287	0.986461	1.34638	1.80243		3-I->3-II	1.00366	1.30319	0.99792	0.659408	0.899996	1.20485
3-II	270297	131619	39899.6	28690.2	6880.44	60097.4	3111.02		3-II->3-III	1.09215	1.08646	1.18988	1.1169	1.18147	1.00401	1.35623		3-II->3-III	0.994789	1.08949	1.02266	1.08179	0.919297	1.2418
3-III	295204	142998	47475.9	32044	8129.04	60338.2	4219.24		3-III->3-IV	1.14651	1.10704	1.20455	1.1092	1.19212	1.19708	1.30342		3-III->3-IV	0.965571	1.05063	0.967461	1.03978	1.04411	1.13686
3-IV	338454	158304	57187.2	35543.3	9690.82	72229.8	5499.43		3-IV->3-V	1.16401	1.17304	1.32684	1.10078	1.21537	0.983	1.90656		3-IV->3-V	1.00776	1.13988	0.945679	1.04412	0.844492	1.63792
3-V	393966	185697	75878.1	39125.4	11777.9	71001.9	10485		3-V->3-VI	1.25304	1.22237	1.39577	1.35931	1.09969	1.08394	1.68409		3-V->3-VI	0.975527	1.1139	1.08481	0.877614	0.865047	1.34401
3-VI	493655	226992	105908	53183.6	12952	76961.8	17657.7
										Tissue growth ratio: increase of tissue volume from one stage to next								Relative growth: values indicate how fast is the tissues growing wrt to ovule growth rate
Stage	Mean total cells	Mean OI cells	Mean II cells	Mean Chalaza cells	Mean Nucellus cells	Mean Funiculus cells			Percentage cell increase	Tot cells	OI	II	CH	N	F			Relative growth	OI	II	CH	N	F
2-III	319.3	53.8	23.5	35	53.3	153.7			2-III->2-IV	1.38396	1.23792	2.04681	1.64571	1.11445	1.3676			2-III->2-IV	0.894472	1.47895	1.18913	0.805256	0.988175
2-IV	441.9	66.6	48.1	57.6	59.4	210.2			2-IV->2-V	1.52025	1.96697	1.71518	1.46528	1.10101	1.46765			2-IV->2-V	1.29384	1.12822	0.963838	0.724228	0.965398
2-V	671.8	131	82.5	84.4	65.4	308.5			2-V->3-I	1.41113	1.80076	1.60606	1.40877	1.02294	1.27196			2-V->3-I	1.27611	1.13813	0.998323	0.724903	0.901375
3-I	948	235.9	132.5	118.9	66.9	392.4			3-I->3-II	1.24209	1.22552	1.46943	1.32969	0.83707	1.21585			3-I->3-II	0.98666	1.18303	1.07053	0.673922	0.978876
3-II	1177.5	289.1	194.7	158.1	56	477.1			3-II->3-III	1.08866	1.13213	1.1207	1.09741	1.15536	1.04087			3-II->3-III	1.03993	1.02943	1.00803	1.06126	0.956102
3-III	1281.9	327.3	218.2	173.5	64.7	496.6			3-III->3-IV	1.07169	1.05286	1.15857	1.09222	1.19474	1.02416			3-III->3-IV	0.982426	1.08107	1.01916	1.11482	0.955653
3-IV	1373.8	344.6	252.8	189.5	77.3	508.6			3-IV->3-V	1.14976	1.27629	1.35894	1.10385	1.00078	0.996481			3-IV->3-V	1.11005	1.18193	0.960072	0.870422	0.866686
3-V	1579.54	439.81	343.54	209.18	77.36	506.81			3-V->3-VI	1.20086	1.25418	1.32124	1.28358	1.11039	1.05168			3-V->3-VI	1.0444	1.10025	1.06889	0.924668	0.875772
3-VI	1896.8	551.6	453.9	268.5	85.9	533
																		Relative cell proliferation: values indicate how fast is the tissues divide wrt to ovule growth
