# Supplementary material for: A digital 3D reference atlas reveals cellular growth patterns shaping the Arabidopsis ovule
Source: eLife. 2021 Jan 6;10:e63262. doi: 10.7554/eLife.63262 (PMC7787667; doi:10.7554/eLife.63262)
Supplement: Figure 5—source data 1. [file elife-63262-fig5-data1.xlsx]

## Sheet: Fig_5
Ovule information			Total cells per layer			WUS expressing cells	WUS expressing cells per layer
Ovule_id	Stage	Total_cells	L1	L2	L3	WUS+	WUS+ L1	WUS+ L2	WUS+ L3
1044_B	1-I	42	26	13	3	0	0	0	0
1046_B	1-I	33	20	11	2	0	0	0	0
1047_A	1-I	39	26	11	2	0	0	0	0
1047_B	1-I	47	27	16	4	0	0	0	0
1047_C	1-I	14	12	2	0	0	0	0	0
1048_A	1-I	32	18	10	4	1	1	0	0
1048_B	1-I	33	18	12	3	0	0	0	0
1048_C	1-I	25	17	7	1	0	0	0	0
1048_D	1-I	14	10	4	0	0	0	0	0
1048_E	1-I	42	24	15	3	0	0	0	0
1048_F	1-I	34	21	9	4	0	0	0	0
1048_G	1-I	29	16	10	3	0	0	0	0
1048_H	1-I	23	15	7	1	0	0	0	0
1048_I	1-I	19	13	6	0	0	0	0	0
805_C	1-I	49	31	15	3	0	0	0	0
805_E	1-I	48	32	12	4	2	2	0	0
805_F	1-I	43	27	12	4	0	0	0	0
790	1-II	105	61	33	11	14	14	0	0
797	1-II	77	46	25	6	3	3	0	0
1044_A	1-II	88	54	28	6	7	7	0	0
1046_A	1-II	71	43	24	4	6	6	0	0
1046_C	1-II	51	33	16	2	6	6	0	0
798_B	1-II	91	59	26	6	10	10	0	0
799_A	1-II	80	50	23	7	3	3	0	0
799_B	1-II	69	45	18	6	2	2	0	0
799_E	1-II	85	52	25	8	5	5	0	0
799_F	1-II	106	61	41	4	8	8	0	0
799_G	1-II	72	48	19	5	2	2	0	0
799_H	1-II	96	54	31	11	6	6	0	0
804_A	1-II	107	69	31	7	15	15	0	0
804_B	1-II	108	68	33	7	10	10	0	0
804_C	1-II	109	65	32	12	7	7	0	0
804_D	1-II	73	45	22	6	4	4	0	0
804_E	1-II	53	36	14	3	1	1	0	0
805_A	1-II	89	53	29	7	8	8	0	0
805_B	1-II	56	34	18	4	2	2	0	0
805_D	1-II	63	37	21	5	3	3	0	0
805_G	1-II	54	40	10	4	2	2	0	0
791	2-I	135	80	42	13	10	10	0	0
792	2-I	118	70	39	9	9	9	0	0
774_C	2-I	166	103	46	17	25	20	5	0
788_B	2-I	196	116	61	19	17	17	0	0
788_C	2-I	169	99	53	17	11	11	0	0
798_A	2-I	166	102	51	13	17	17	0	0
798_C	2-I	186	108	60	18	20	19	1	0
798_D	2-I	146	92	42	12	22	18	4	0
803_A	2-I	134	87	37	10	16	14	2	0
803_B	2-I	118	75	37	6	9	7	2	0
789	2-II	224	129	69	26	27	24	3	0
774_A	2-II	205	132	56	17	27	27	0	0
775_A	2-II	232	137	74	21	27	23	4	0
775_B	2-II	189	114	57	18	20	17	3	0
776_A	2-II	208	122	63	23	21	20	1	0
776_B	2-II	266	162	80	24	30	26	4	0
776_C	2-II	181	110	51	20	25	25	0	0
776_D	2-II	224	135	66	23	26	26	0	0
788_A	2-II	202	123	61	18	18	17	1	0
773_A	2-III	345	207	95	43	25	25	0	0
773_B	2-III	299	180	92	27	23	20	3	0
773_C	2-III	364	230	99	35	25	23	2	0
773_D	2-III	280	173	83	24	25	25	0	0
773_E	2-III	322	206	90	26	31	28	3	0
777_A	2-III	436	236	142	58	24	23	1	0
777_B	2-III	310	186	91	33	18	18	0	0
777_C	2-III	397	236	122	39	37	30	7	0
777_F	2-III	317	187	89	41	17	17	0	0
777_G	2-III	396	230	130	36	33	26	6	1
