# Supplementary material for: A digital 3D reference atlas reveals cellular growth patterns shaping the Arabidopsis ovule
Source: eLife. 2021 Jan 6;10:e63262. doi: 10.7554/eLife.63262 (PMC7787667; doi:10.7554/eLife.63262)
Supplement: Figure 6—source data 1. [file elife-63262-fig6-data1.xlsx]

## Sheet: Fig_6
Ovule_id	Total_cells	Total_volume (µm³)	PD_extension (µm)
785_D	24	3281.25	11.5851
780_C	26	4070.14	11.4197
786_E	29	3563.07	13.6117
780_A	32	4792.65	15.7676
786_C	33	4302.37	15.0692
787_E	34	3899.36	15.8918
787_B	34	4142.63	17.0152
787_A	37	4161.27	16.372
784_A	38	5118.47	17.6788
785_A	39	5650.71	17.6726
784_D	39	5501.24	18.8751
785_B	39	5238.57	18.0906
785_C	41	5438.03	15.1652
786_A	41	4603.34	19.223
786_F	43	5248.31	16.9464
787_D	43	4983	20.0516
782_B	44	5712.34	19.8921
784_B	45	5755.68	18.3183
786_D	45	6746.69	20.3921
786_G	46	5273.12	21.3578
783_A	46	6319.94	18.2162
787_C	47	6122.84	21.7578
786_B	48	5889.82	21.7139
397_C	51	5862.8	18.2886
781_C	53	7914.86	18.7745
397_A	54	6508.62	18.2807
779_E	54	8373.87	22.8135
397_B	55	6523.64	17.5918
772_C	55	7911.55	27.2121
598_H	55	9037.23	26.0105
778_D	56	7664.59	19.1825
780_B	56	8324.2	23.9349
784_E	57	6919.96	22.2969
396_C	60	6962.56	18.2227
783_B	60	7187.03	21.94
783_C	61	7914.03	23.8232
783_D	61	8213.5	21.6929
783_E	61	7780.67	24.0534
396_D	62	8505.74	24.6303
784_C	62	8811.19	24.1029
396_E	63	8775.55	20.4184
396_F	63	8516.57	23.5184
396_B	65	9585.61	19.9289
290_D	65	7762.03	23.6713
397_D	66	7024.86	15.3205
782_A	66	9348.09	26.7333
779_A	67	9229.85	25.5835
601_A	69	8994.03	23.5211
396_A	74	9276.58	22.1402
782_C	75	11231.7	28.5385
601_G	77	10845.2	25.2623
779_B	77	11344.6	28.0405
394_D	77	11432.4	31.3566
778_C	77	9786.64	29.1501
779_C	78	11801.3	29.9462
778_B	81	11274.5	27.9837
291_D	83	11176.7	32.4524
601_B	84	11011.3	27.5761
781_A	84	12316.2	32.6663
601_D	85	11124.1	28.2204
779_D	86	10522.5	28.5577
601_F	86	11050.5	29.3062
290_C	86	11288.1	26.6492
601_C	89	10658.2	28.1492
778_A	90	12643.6	32.2232
598_F	91	14137.5	33.9073
600_B	92	13708.9	29.777
601_E	92	11550.1	28.8984
781_B	92	13161.4	32.6081
290_A	94	12425.5	29.1089
223	99	12341.5	35.4281
290_E	101	12041.3	34.4479
290_G	102	12799.4	32.9693
291_A	102	14120.2	32.8294
394_B	105	12591	35.0062
771_A	111	19808.9	43.2526
598_I	116	12030.8	39.0917
290_F	116	14978.5	33.8284
600_A	117	14950.6	35.0363
291_B	117	16945.9	36.1139
291_C	120	16693.7	31.6129
394_A	120	15810	40.078
393_E	121	18173.5	38.235
598_E	122	17096.3	39.0337
394_C	124	16699.4	45.3889
226_E	126	17686.4	44.2845
393_A	126	15660.9	42.7837
765	127	19709.9	41.5372
760_C	131	16603.6	44.6972
598_D	131	19770.9	40.1501
290_B	132	16577	40.9275
598_B	134	17588.8	33.464
598_G	136	19061.4	42.9023
772_B	137	19726.3	47.5951
226_C	137	21027.9	42.9282
593_G	141	18838.9	45.7137
764_A	143	18713.7	48.701
393_C	143	20448.2	39.5723
591_D	144	18362.7	48.9237
598_A	145	20852.8	44.8788
598_C	150	18808.7	45.3049
772_A	161	23763.7	51.7677
760_D	163	22977.9	49.3269
393_D	164	20488.7	48.9485
593_E	165	20283.6	54.44
589_B	171	23490.9	50.1325
766_A	178	28606.5	61.1666
593_C	179	22073.6	58.672
294_A	179	24571.6	65.7137
593_F	180	22419.7	52.6535
591_C	181	20410.6	59.8716
226_F	182	22144.8	60.5152
589_C	183	23737	59.4302
593_A	183	23710	58.9617
762_B	184	27534.4	55.5962
593_H	189	22591.6	57.5683
766_C	189	26828.8	62.5138
590_D	192	24835.2	58.545
761_B	193	23525.4	59.0368
226_D	193	28399.1	57.6309
593_B	194	24415.8	53.8749
589_A	195	26210	54.6315
294_G	198	28502.7	57.4787
502	199	29829.8	60.6
226_A	201	24911.5	62.3967
393_B	202	25942.8	54.7595
760_B	202	24877	58.4867
226_B	202	25177.8	63.2191
591_A	205	23960.4	59.7304
761_A	208	28150.7	63.0457
760_A	209	28322.5	59.4099
766_B	210	31183	73.0928
762_A	215	30141.2	60.9655
591_B	222	25724.3	62.6833
593_D	223	25673.4	63.7952
500	251	34350.6	61.5764
762_C	255	32663.2	67.5846
589_D	260	34723.2	67.643
