# Supplementary material for: A digital 3D reference atlas reveals cellular growth patterns shaping the Arabidopsis ovule
Source: eLife. 2021 Jan 6;10:e63262. doi: 10.7554/eLife.63262 (PMC7787667; doi:10.7554/eLife.63262)
Supplement: Figure 7—source data 1. — The additional excel file indicates the ovule IDs, stage and the orientation along the anterior-posterior axis of early stage wild-type ovule. [file elife-63262-fig7-data1.xlsx]

## Sheet: Fig_7C
Ovule_id	Stage	Length along anterior surface (μm)	Length along posterior surface (μm)	Length_difference (μm)
785_D	1-I	12.625	10.5453	2.07973
780_C	1-I	12.0428	10.7965	1.24635
786_E	1-I	14.7819	12.4415	2.34037
780_A	1-I	15.5967	15.9386	0.3419
786_C	1-I	17.2388	12.8996	4.3392
787_B	1-I	18.2333	15.7971	2.43612
787_E	1-I	15.9496	15.834	0.115592
787_A	1-I	18.6232	14.1207	4.50245
784_A	1-I	20.8513	14.5062	6.34503
784_D	1-I	20.3664	17.3838	2.9825
785_A	1-I	20.4662	14.879	5.58714
785_B	1-I	18.625	17.5562	1.06875
785_C	1-I	16.3866	13.9437	2.44295
786_A	1-I	21.6669	16.7791	4.88782
786_F	1-I	20.5954	13.2975	7.29788
787_D	1-I	19.8083	20.295	0.48665
782_B	1-I	20.7891	18.9951	1.79406
784_B	1-I	20.3212	16.3155	4.00572
786_D	1-I	22.3553	18.429	3.92636
783_A	1-I	17.5	18.9323	1.43235
786_G	1-I	22.4288	20.2868	2.14192
787_C	1-I	23.2977	20.2179	3.07975
786_B	1-I	22.2256	21.2021	1.02347
397_C	1-II	18.3315	18.2456	0.085925
781_C	1-II	19.7727	17.7764	1.99638
397_A	1-II	18.2261	18.3353	0.109142
779_E	1-II	24.0909	21.5361	2.5548
397_B	1-II	17.3422	17.8414	0.49923
598_H	1-II	30.1079	21.9131	8.1948
772_C	1-II	26.4396	27.9846	1.545
778_D	1-II	19.246	19.1191	0.1269
780_B	1-II	20.689	27.1807	6.4917
784_E	1-II	24.3792	20.2146	4.16459
396_C	1-II	17.5077	18.9377	1.42997
783_B	1-II	21.5706	22.3093	0.738675
783_C	1-II	24.082	23.5644	0.51765
783_D	1-II	21.6067	21.7791	0.172467
783_E	1-II	24.0663	24.0405	0.025775
396_D	1-II	24.8566	24.404	0.452625
784_C	1-II	25.0912	23.1146	1.97659
396_E	1-II	19.4912	21.3456	1.85448
396_F	1-II	23.7658	23.2709	0.49485
290_D	1-II	25.9405	21.4021	4.53839
396_B	1-II	21.1416	18.7161	2.42552
397_D	1-II	15.1295	15.5115	0.382033
782_A	1-II	24.3874	29.0791	4.69175
779_A	1-II	25.5831	25.5839	0.0008
601_A	1-II	22.0918	24.9505	2.85864
396_A	1-II	23.1645	21.1158	2.04875
782_C	1-II	29.1917	27.8853	1.30638
394_D	1-II	33.2626	29.4505	3.81202
601_G	1-II	28.4986	22.0261	6.47253
778_C	1-II	29.5247	28.7755	0.749117
779_B	1-II	28.1609	27.9201	0.24078
779_C	1-II	33.2337	26.6588	6.5749
778_B	1-II	28.7069	27.2604	1.44644
291_D	1-II	37.8126	27.0922	10.7203
601_B	1-II	27.6569	27.4954	0.161467
781_A	1-II	30.2255	35.1071	4.8816
601_D	1-II	28.7924	27.6484	1.144
290_C	1-II	32.6427	20.6557	11.987
601_F	1-II	30.0318	28.5807	1.45113
779_D	1-II	30.2453	26.8701	3.37517
601_C	1-II	30.3008	25.9977	4.30312
778_A	1-II	34.2298	30.2166	4.01327
598_F	1-II	35.5048	32.3098	3.19494
600_B	1-II	30.5514	29.0026	1.54878
601_E	1-II	32.3092	25.4875	6.82175
781_B	1-II	34.5973	30.6189	3.97841
290_A	1-II	32.349	25.8688	6.48018
223	1-II	38.358	32.4982	5.85978
290_E	1-II	40.4775	28.4183	12.0592
290_G	1-II	36.5493	29.3894	7.15988
291_A	1-II	33.8203	31.8384	1.98193
394_B	1-II	37.3744	32.638	4.73634
771_A	1-II	46.4021	40.1031	6.299
290_F	1-II	37.1637	30.4931	6.67065
598_I	1-II	41.6774	36.5059	5.17148
291_B	1-II	39.9517	32.2761	7.67553
600_A	1-II	38.4313	31.6413	6.79
291_C	1-II	33.4719	29.7539	3.71802
394_A	1-II	44.6895	35.4665	9.22302
393_E	1-II	44.9797	31.4902	13.4895
598_E	1-II	44.7593	33.3081	11.4512
394_C	1-II	52.3285	38.4493	13.8792
393_A	1-II	45.2713	40.2962	4.97504
598_D	1-II	43.5262	36.774	6.7522
290_B	1-II	47.1523	34.7027	12.4496
598_B	1-II	38.2652	28.6628	9.6024
226_E	2-I	49.738	38.831	10.9069
765	2-I	38.9146	44.1598	5.2452
760_C	2-I	46.177	43.2175	2.95945
598_G	2-I	46.6995	39.1051	7.59443
226_C	2-I	56.1346	29.7218	26.4128
772_B	2-I	48.9686	46.2216	2.74702
593_G	2-I	52.4514	38.9759	13.4755
393_C	2-I	45.2584	33.8861	11.3723
764_A	2-I	47.6073	49.7948	2.18751
591_D	2-I	56.5292	41.3181	15.2111
598_A	2-I	45.365	44.3927	0.97239
598_C	2-I	45.7426	44.8672	0.875425
772_A	2-I	53.3446	50.1907	3.15393
760_D	2-I	56.109	42.5448	13.5642
393_D	2-I	55.2772	42.6197	12.6575
593_E	2-I	63.45	45.43	18.02
589_B	2-I	58.1551	42.1098	16.0453
766_A	2-I	69.4381	52.895	16.5432
294_A	2-I	70.6962	60.7312	9.96503
593_C	2-I	64.8436	52.5003	12.3433
593_F	2-I	58.1126	47.1944	10.9182
591_C	2-I	65.3165	54.4268	10.8897
226_F	2-I	69.6585	51.3719	18.2866
589_C	2-I	65.9857	52.8747	13.111
593_A	2-I	65.3811	52.5423	12.8389
762_B	2-I	57.34	53.8524	3.48767
593_H	2-I	63.9796	51.157	12.8226
766_C	2-I	70.2824	54.7452	15.5372
590_D	2-I	67.56	49.53	18.03
226_D	2-I	61.7152	53.5467	8.16847
761_B	2-I	67.4018	50.6719	16.7299
593_B	2-I	56.145	51.605	4.54
589_A	2-I	66.2041	43.059	23.1451
294_G	2-I	64.2458	50.7117	13.5341
502	2-I	69.86	51.34	18.52
226_A	2-I	73.4615	51.3319	22.1296
226_B	2-I	73.2161	53.2222	19.9939
393_B	2-I	61.3234	48.1957	13.1278
760_B	2-I	65.9404	51.0331	14.9073
591_A	2-I	68.4946	50.9662	17.5285
761_A	2-I	72.2402	53.8513	18.3889
760_A	2-I	63.8412	54.9785	8.86268
766_B	2-I	80.1415	66.0443	14.0972
762_A	2-I	69.6067	52.3243	17.2823
591_B	2-I	71.273	54.0936	17.1795
593_D	2-I	69.3351	58.2553	11.0798
500	2-I	70.8826	52.2702	18.6123
762_C	2-I	76.5641	58.6052	17.9589
589_D	2-I	74.7027	60.5833	14.1195

## Sheet: Fig_7D
Ovule_id	Stage	Orientation
802_a	early 2-III	Straight
802_b	early 2-III	Straight
802_c	early 2-III	Straight
802_d	early 2-III	Straight
802_e	early 2-III	Slight turn
802_f	early 2-III	Slight turn
802_g	early 2-III	Slight turn
802_h	early 2-III	Complete turn
777_a	2-IV	Slight turn
777_b	2-IV	Slight turn
777_c	2-IV	Slight turn
777_d	2-IV	Slight turn
777_e	2-IV	Slight turn
777_f	2-IV	Slight turn
777_g	late 2-III	Straight
777_h	2-IV	Complete turn
294_a	late 2-III	Slight turn
294_b	late 2-III	Slight turn
294_c	late 2-III	Slight turn
294_d	late 2-III	Slight turn
294_e	late 2-III	Straight
294_f	late 2-III	Slight turn
294_g	late 2-III	Straight
294_h	late 2-III	Complete turn
416_a	early 2-III	Slight turn
416_b	early 2-III	Slight turn
416_c	early 2-III	Straight
473_a	late 2-III	Straight
473_b	late 2-III	Straight
473_c	late 2-III	Slight turn
473_d	late 2-III	Slight turn
474_a	2-IV	Slight turn
474_b	late 2-III	Slight turn
474_c	late 2-III	Slight turn
474_d	early 2-III	Straight
474_e	late 2-III	Straight
603_a	early 2-III	Straight
603_b	early 2-III	Straight
603_c	early 2-III	Slight turn
603_d	early 2-III	Slight turn
