# Supplementary material for: A digital 3D reference atlas reveals cellular growth patterns shaping the Arabidopsis ovule
Source: eLife. 2021 Jan 6;10:e63262. doi: 10.7554/eLife.63262 (PMC7787667; doi:10.7554/eLife.63262)
Supplement: Figure 8—source data 1. [file elife-63262-fig8-data1.xlsx]

## Sheet: Fig_8
Posterior chalaza					Anterior chalaza
Ovule_id	Stage	Total_cells	Tissue _volume (µm³)		Ovule_id	Stage	Total_cells	Tissue _volume (µm³)
406	2-III	35	4231.62		404	2-IV	8	1244.4
294_D	2-III	29	3229.04		449	2-IV	7	1245.61
294_E	2-III	25	2242.72		450	2-IV	13	2024.91
416_A	2-III	35	4418.12		462	2-IV	9	1433.81
416_B	2-III	29	3587.53		405_A	2-IV	11	1803.6
473_A	2-III	39	4305.37		405_B	2-IV	11	1820.4
474_B	2-III	39	4559.87		473_C	2-IV	9	1158.51
603_A	2-III	42	5023.51		474_A	2-IV	11	1682.64
603_C	2-III	41	4548.05		474_C	2-IV	6	969.392
801_F	2-III	36	3437.77		474_E	2-IV	7	1317.33
404	2-IV	51	5419.58		422	2-V	26	5592.56
449	2-IV	66	6922.46		425	2-V	18	4368.34
450	2-IV	52	6257.13		424_B	2-V	10	2749.23
462	2-IV	45	5126.97		472_B	2-V	9	2064.96
405_A	2-IV	55	6424.15		490_A	2-V	16	3976.68
405_B	2-IV	55	5940.49		490_B	2-V	12	2769.46
473_C	2-IV	37	3947.04		467	2-V	20	4045.82
474_A	2-IV	43	4183.94		424_A	2-V	10	2147.6
474_C	2-IV	40	3916.07		424_C	2-V	9	2058.24
474_E	2-IV	40	4688.9		490_C	2-V	8	1472.13
422	2-V	70	7924.29		491	3-IV	33	14073.1
425	2-V	68	9633.08		410	3-IV	53	19159.5
424_B	2-V	80	9691.06		494	3-IV	45	13730
472_B	2-V	82	9420.93		512	3-IV	43	15268.5
490_A	2-V	81	8945.77		514	3-IV	51	21537.9
490_B	2-V	86	9119.2		517	3-IV	54	18968.2
467	2-V	66	8046.8		513_A	3-IV	68	17501.7
424_A	2-V	59	7378.25		520	3-IV	63	22497.1
424_C	2-V	64	8851.2		539	3-IV	61	22938.3
490_C	2-V	56	6416.77		610	3-IV	44	13302.7
491	3-IV	159	21224.8
410	3-IV	123	15356.8
494	3-IV	136	18254.3
512	3-IV	119	14834.1
514	3-IV	158	19521.5
517	3-IV	119	15592.1
513_A	3-IV	160	19275.8
520	3-IV	156	21302.1
539	3-IV	131	17890.7
610	3-IV	119	13203.8
