# Supplementary material for: A digital 3D reference atlas reveals cellular growth patterns shaping the Arabidopsis ovule
Source: eLife. 2021 Jan 6;10:e63262. doi: 10.7554/eLife.63262 (PMC7787667; doi:10.7554/eLife.63262)
Supplement: Figure 9—source data 1. [file elife-63262-fig9-data1.xlsx]

## Sheet: Fig_9
Ovule_id	Stage	Number_cells_ii1'	Tissue_volume (µm³)
555	3-VI	99	25315.4
557	3-VI	79	18351.3
559	3-VI	33	8886.62
561	3-VI	66	17425.5
751	3-VI	63	16499
752	3-VI	43	12467.9
753	3-VI	73	17369.2
754	3-VI	52	13548.9
755	3-VI	55	13470.5
756	3-VI	45	9578.76
444	3-V	4	1731.38
464	3-V	18	4305.04
492	3-V	15	3877.03
525	3-V	32	7048.01
534	3-V	19	4156.75
535	3-V	12	2309.43
540	3-V	42	10743.7
541	3-V	45	11586
542	3-V	35	8057.73
612	3-V	52	12760.9
613	3-V	15	3853.11
410	3-IV	6	1455.47
491	3-IV	7	1484.07
494	3-IV	2	602.414
512	3-IV	1	280.442
514	3-IV	10	1980.49
517	3-IV	6	1576.59
520	3-IV	10	2106.08
539	3-IV	23	5867.45
610	3-IV	5	1159.92
513_A	3-IV	0	0
428	3-III	0	0
429	3-III	2	330.019
430	3-III	0	0
436	3-III	0	0
528	3-III	1	184.223
611	3-III	0	0
614	3-III	0	0
616	3-III	0	0
495_A	3-III	5	1008.31
495_B	3-III	0	0
507_A	3-III	1	192.126
403	3-II	1	144.409
412	3-II	0	0
434	3-II	0	0
508	3-II	0	0
509	3-II	1	77.289
522	3-II	0	0
526	3-II	0	0
527	3-II	0	0
486_A	3-II	0	0
507_B	3-II	0	0
420	3-I	0	0
439	3-I	0	0
440	3-I	0	0
451	3-I	0	0
515	3-I	0	0
543	3-I	0	0
606	3-I	0	0
608	3-I	0	0
407_A	3-I	0	0
617_B	3-I	0	0
