# Supplementary material for: A digital 3D reference atlas reveals cellular growth patterns shaping the Arabidopsis ovule
Source: eLife. 2021 Jan 6;10:e63262. doi: 10.7554/eLife.63262 (PMC7787667; doi:10.7554/eLife.63262)
Supplement: Figure 10—source data 1. — The additional sheet includes the list of ovule IDs, stage, number of cells and tissue volume of nucellus and funiculus wild-type and ino-5 ovules. [file elife-63262-fig10-data1.xlsx]

## Sheet: Fig_10B-C
Genotype	Ovule_id	Stage	Total_cells	Total _volume
ino-5	1019_C	2-II	230	28862.4
ino-5	1019_B	2-II	231	30264.2
ino-5	1018_D	2-II	239	28284.7
ino-5	1019_A	2-II	240	29744.9
ino-5	1018_A	2-II	246	29078.2
ino-5	1018_B	2-II	246	32753.3
ino-5	1018_C	2-II	256	33254.1
ino-5	1015_C	2-I	141	19277
ino-5	1015_L	2-I	149	18899.3
ino-5	1015_J	2-I	150	19981.7
ino-5	1022_B	2-I	159	20292.2
ino-5	1015_H	2-I	159	21446.9
ino-5	1015_D	2-I	165	20583.4
ino-5	1015_E	2-I	173	21640.4
ino-5	1015_I	2-I	177	23490.7
ino-5	1015_F	2-I	181	23366.3
ino-5	1015_A	2-I	208	23798
ino-5	1025_F	1-II	54	7294.3
ino-5	1025_J	1-II	60	6962.56
ino-5	1024_C	1-II	62	8505.73
ino-5	1025_E	1-II	70	9283.22
ino-5	1025_C	1-II	77	8825.06
ino-5	1025_D	1-II	80	10032.6
ino-5	1015_G	1-II	90	12627.4
ino-5	1025_A	1-II	100	13571.5
ino-5	1024_B	1-II	106	15804.3
ino-5	1025_B	1-II	109	13823.6
ino-5	1024_A	1-II	113	16618.7
ino-5	1022_A	1-II	123	16289.1
Col-0	782	1-II	63	8803.21
Col-0	783_B	1-II	54	6444.81
Col-0	783_C	1-II	59	7697.76
Col-0	783_D	1-II	61	8213.49
Col-0	783_E	1-II	60	7679.08
Col-0	781_A	1-II	84	12316.3
Col-0	778_A	1-II	87	12184.6
Col-0	778_B	1-II	81	11333.2
Col-0	601_A	1-II	70	9122.17
Col-0	601_B	1-II	81	10736.3
Col-0	601_C	1-II	89	10658.2
Col-0	601_E	1-II	92	11550.1
Col-0	601_F	1-II	86	11050.5
Col-0	601_G	1-II	78	11486.4
Col-0	396_A	1-II	69	8462.24
Col-0	396_B	1-II	55	6327.44
Col-0	396_C	1-II	49	5574.29
Col-0	396_D	1-II	53	6978.88
Col-0	397_A	1-II	54	7486.24
Col-0	397_B	1-II	55	7562.85
Col-0	397_C	1-II	51	6842.05
Col-0	784_C	1-II	62	8811.19
Col-0	784_E	1-II	57	6919.96
Col-0	771	1-II	111	19838.2
Col-0	394_B	1-II	105	12591
Col-0	290_A	1-II	94	12425.5
Col-0	290_C	1-II	86	10522.5
Col-0	290_D	1-II	65	9585.61
Col-0	761	2-I	208	28150.7
Col-0	766	2-I	176	28319.4
Col-0	589_A	2-I	195	26152.8
Col-0	589_B	2-I	170	23490.9
Col-0	760_A	2-I	209	28322.5
Col-0	760_B	2-I	202	25177.8
Col-0	762_A	2-I	215	30141.2
Col-0	772_A	2-I	161	23763.7
Col-0	772_B	2-I	137	21027.9
Col-0	765	2-I	127	19709.9
Col-0	764_A	2-I	144	20478.2
Col-0	764_B	2-II	243	35478
Col-0	764_C	2-II	199	30157.3
Col-0	769	2-II	237	34947.7
Col-0	763_A	2-II	219	31159.2
Col-0	763_B	2-II	240	31072.2
Col-0	794_A	2-II	243	26583.6
Col-0	794_B	2-II	238	25693.1
Col-0	794_C	2-II	259	27238.3
Col-0	796	2-II	206	23497.6
Col-0	801_A	2-II	192	19390.1
Col-0	801_B	2-II	218	22073.7
Col-0	801_C	2-II	176	18823.1
Col-0	801_D	2-II	198	21231.7

## Sheet: Fig_10E-H
ino-5 nucellus analysis					ino-5 funiculus analysis					Col-0 nucellus analysis					Col-0 funiculus analysis
Ovule_id	Stage	Total_cells	Tissue _volume (µm³)		Ovule_id	Stage	Total_cells	Tissue _volume (µm³)		Ovule_id	Stage	Total_cells	Tissue _volume (µm³)		Ovule_id	Stage	Total_cells	Tissue _volume (µm³)
1021_D	2-III	37	5054.89		660	2-V	233	28293.8		603_A	2-III	47	4635.6		603_A	2-III	159	21706.9
1021_C	2-III	46	6428.1		1016_A	2-V	253	36978.8		473_A	2-III	46	5219.85		473_A	2-III	176	22713.6
1021_A	2-III	46	5995.97		647	2-V	271	34134.7		294_E	2-III	57	5815.24		294_E	2-III	135	15982.8
696_A	2-III	53	4949.69		1017_A	2-V	268	33123.5		406	2-III	62	6604.08		406	2-III	157	18373.5
1021_B	2-III	53	6908.74		662	2-V	227	25150.3		603_C	2-III	37	4253.49		603_C	2-III	142	19096.5
696_B	2-III	59	4913.16		651_B	2-V	245	26898		416_A	2-III	55	7388.91		416_A	2-III	177	25609.5
659_B	2-IV	77	8974.6		658_A	2-V	267	25304.9		474_B	2-III	56	5753.96		474_B	2-III	197	26219.2
658_B	2-IV	70	7742.29		1009_A	2-V	271	33254.1		416_B	2-III	59	6836.79		416_B	2-III	171	22847.1
657	2-IV	62	6470.09		659_A	2-V	296	32941.9		801_F	2-III	46	4624.52		801_F	2-III	112	11537.1
660	2-V	72	7091.73		1016_C	2-V	319	38444.3		294_D	2-III	68	6686.65		294_D	2-III	111	14590.3
1016_A	2-V	67	8123.09		1017_C	2-V	260	33400.1		404	2-IV	66	6726.58		404	2-IV	223	28256.9
647	2-V	64	6453.91		1017_B	2-V	308	38021		405_A	2-IV	66	7262.98		405_A	2-IV	190	24175.8
1017_A	2-V	72	8524.31		1008_B	2-V	302	38499.9		405_B	2-IV	69	7570.81		405_B	2-IV	190	23557.4
662	2-V	75	9001.24		661	2-V	295	38725.7		449	2-IV	54	6358.75		449	2-IV	204	23350.7
651_B	2-V	64	5837.35		695	2-V	282	35692.8		450	2-IV	60	7992.44		450	2-IV	191	23660
658_A	2-V	69	6834.14		651_A	2-V	338	37647.1		462	2-IV	55	6791.46		462	2-IV	247	29534.9
1009_A	2-V	77	8438.52		1008_A	2-V	321	40430.9		474_A	2-IV	59	6618.07		474_A	2-IV	220	25371.7
659_A	2-V	63	7034.37		1007_A	2-V	293	40596.4		473_C	2-IV	51	5225.87		473_C	2-IV	179	20655.4
1016_C	2-V	62	9291.64		1013	2-V	317	40788.6		474_C	2-IV	50	5891.91		474_C	2-IV	213	26142.2
1017_C	2-V	82	8564.05		1009_B	2-V	362	39285		474_E	2-IV	64	6906.79		474_E	2-IV	245	29760
1017_B	2-V	65	8334.81		659_B	2-IV	150	22472.9		419	2-V	67	9288.12		419	2-V	329	40366.3
1008_B	2-V	83	9503.05		658_B	2-IV	204	18381.2		422	2-V	78	6976.21		422	2-V	346	37741.3
661	2-V	80	12312.7		657	2-IV	254	26238.5		424_B	2-V	70	6025.63		424_B	2-V	265	29507.6
695	2-V	71	7711.77		1021_D	2-III	179	23349.5		425	2-V	86	9229.05		425	2-V	357	46411
651_A	2-V	53	7016.64		1021_C	2-III	192	27327.4		467	2-V	52	5837.23		467	2-V	308	33583.6
1008_A	2-V	80	10970.9		1021_A	2-III	196	24696		472_A	2-V	61	6721.51		472_A	2-V	283	38992.1
1007_A	2-V	77	8596.62		696_A	2-III	162	20124.9		472_B	2-V	65	6243.23		472_B	2-V	337	39501.6
1013	2-V	82	9755.44		1021_B	2-III	241	30233.9		472_C	2-V	61	6697.75		472_C	2-V	309	35738.1
1009_B	2-V	71	8171.84		696_B	2-III	164	17068.9		490_B	2-V	47	5593.14		490_B	2-V	285	28287.5
1007_B	3-I	75	8216.07		1007_B	3-I	351	43370.6		490_C	2-V	67	6355.96		490_C	2-V	266	29980.5
689	3-I	83	11206.1		689	3-I	322	46235.7		420	3-I	74	7031.83		420	3-I	402	49046.5
1006	3-I	74	9319.7		1006	3-I	383	55286.7		439	3-I	63	6606.49		439	3-I	383	39133.7
1012	3-I	68	7650.69		1012	3-I	388	46916.1		440	3-I	76	7251.6		440	3-I	388	44809.3
684	3-I	92	10671.9		684	3-I	370	46377		451	3-I	60	5905.17		451	3-I	359	40549.7
682	3-I	79	8037.95		682	3-I	333	37520.1		515	3-I	74	7253.1		515	3-I	354	43906.3
649_B	3-I	75	9659.84		649_B	3-I	408	54502		543	3-I	91	8998.82		543	3-I	388	49556.7
681	3-I	74	8152.77		681	3-I	363	41855.4		606	3-I	62	6880.67		606	3-I	424	45173.1
649_A	3-I	80	9659.33		649_A	3-I	410	50540.4		608	3-I	40	4785		608	3-I	349	34070.5
692_A	3-I	91	10809.4		692_A	3-I	361	43400.8		617_B	3-I	69	8568.39		617_B	3-I	407	47912.7
736	3-I	99	8757.61		736	3-I	392	53512.3		407_A	3-I	60	6467.6		407_A	3-I	470	52205.5
1010_B	3-I	72	9010.15		1010_B	3-I	404	50075.3		403	3-II	52	7205.88		403	3-II	442	55753.6
688	3-I	82	7632.22		688	3-I	411	48446.2		507_B	3-II	70	7695.91		507_B	3-II	421	55621.3
1010_A	3-I	96	10391.4		1010_A	3-I	410	46714.3		508	3-II	68	7418.4		508	3-II	487	62540.7
666	3-II	110	12219.3		666	3-II	375	47594.6		526	3-II	35	6154.24		526	3-II	514	62114.3
683	3-II	78	12111.5		683	3-II	414	54421.4		412	3-II	44	6591.05		412	3-II	571	73355.7
692_B	3-II	109	14209.7		692_B	3-II	395	50224		434	3-II	39	5533.25		434	3-II	493	61572.4
691	3-II	113	14170.7		691	3-II	371	52948.9		486_A	3-II	76	7941		486_A	3-II	421	49860.4
1030_A	3-II	85	10821.9		1030_A	3-II	391	50067.2		509	3-II	64	7945.12		509	3-II	497	69256.3
693	3-II	97	13569		693	3-II	465	62415.8		522	3-II	65	7028.19		522	3-II	401	46386.6
665	3-II	83	9783.39		665	3-II	375	46809.7		527	3-II	47	5291.34		527	3-II	524	64512.4
739	3-II	86	8254.93		739	3-II	396	39547.9		428	3-III	70	7976.7		428	3-III	492	61812
1004_B	3-II	73	10192.4		1004_B	3-II	444	60204.1		429	3-III	91	9181.39		429	3-III	554	63071.6
1030_B	3-III	101	13917		1030_B	3-III	400	54025.1		495_A	3-III	64	9099.31		495_A	3-III	507	59906.4
1003	3-III	82	10023.4		1003	3-III	466	59795.4		495_B	3-III	79	9294.04		495_B	3-III	593	80286.5
694	3-III	115	13516.9		694	3-III	465	66950		507_A	3-III	74	7332.38		507_A	3-III	439	52814
1026_B	3-III	87	10754.3		1026_B	3-III	476	59085.4		528	3-III	65	9102.39		528	3-III	494	57487.4
1026_A	3-III	96	11945.4		1026_A	3-III	426	54956.4		616	3-III	28	5459.01		616	3-III	408	41687.3
653	3-III	82	10747.1		653	3-III	434	58939.2		430	3-III	59	7621.51		430	3-III	494	57393.8
1004_C	3-III	88	11597.8		1004_C	3-III	494	65843.7		436	3-III	47	7429.7		436	3-III	464	62963.9
640	3-IV	110	12448.2		640	3-IV	443	55661.4		611	3-III	70	8794		611	3-III	521	65959
745	3-IV	105	20211.5		745	3-IV	447	95627.9		614	3-III	61	6002.09		614	3-III	492	50569.5
655	3-IV	115	17484.6		655	3-IV	424	65023.6		410	3-IV	74	9505.24		410	3-IV	495	65062.1
738	3-IV	92	15857.8		738	3-IV	423	70835.4		491	3-IV	91	10488.8		491	3-IV	601	101448
1027_B	3-IV	93	13304.8		1027_B	3-IV	461	59655		494	3-IV	91	13826.9		494	3-IV	576	85595.1
1002	3-IV	106	13240.9		1002	3-IV	562	72473.6		512	3-IV	70	8164.64		512	3-IV	403	54798.3
1004_A	3-IV	131	15299.1		1004_A	3-IV	536	70220.4		513_A	3-IV	64	7777.66		513_A	3-IV	442	56405.8
1027_A	3-IV	114	15074		1027_A	3-IV	519	65101.7		514	3-IV	75	10767.7		514	3-IV	636	95065.4
746	3-IV	91	14562.3		746	3-IV	458	59646.7		517	3-IV	80	8576.71		517	3-IV	420	56759.4
652	3-IV	105	16283.6		652	3-IV	479	66347.7		520	3-IV	84	10495.6		520	3-IV	526	74653
1028	3-IV	100	15964.5		1028	3-IV	511	68048.4		539	3-IV	90	10409.8		539	3-IV	511	75240.1
654	3-IV	75	14299.9		654	3-IV	524	63430.5		610	3-IV	54	6895.11		610	3-IV	476	57271
671	3-IV	98	18726.3		671	3-IV	419	62178.5		444	3-V	55	7375.46		444	3-V	507	74507.6
742	3-IV	100	15467.5		742	3-IV	499	70796.1		464	3-V	55	7375.46		464	3-V	509	74825.5
656	3-IV	106	16109.7		656	3-IV	515	72984.1		492	3-V	83	9851.76		492	3-V	539	64436.2
685	3-V	112	18165.2		685	3-V	436	56031.9		525	3-V	97	13674.6		525	3-V	479	67814.2
740	3-V	131	16596.7		740	3-V	492	57833.2		534	3-V	56	11660		534	3-V	467	62891.1
1032_A	3-V	132	20471		1032_A	3-V	554	70332.1		535	3-V	106	14916.6		535	3-V	551	77517.1
643	3-V	95	13666		643	3-V	615	96621.3		540	3-V	86	15033.6		540	3-V	552	81278
1034	3-V	135	23572.6		1034	3-V	498	77008.5		541	3-V	91	11695.1		541	3-V	561	85472
644	3-V	111	17068.8		644	3-V	523	77441.8		542	3-V	100	14540.6		542	3-V	496	64182.1
1035_B	3-V	113	18755.1		1035_B	3-V	517	72072.5		612	3-V	52	12513.6		612	3-V	475	68741.8
1036	3-V	111	19963.9		1036	3-V	559	77161.1		613	3-V	70	10920.2		613	3-V	439	59355.5
1032_B	3-V	109	18264.2		1032_B	3-V	526	74029.9		557	3-VI	46	10634.7		557	3-VI	502	76893
645	3-V	114	18622.2		645	3-V	506	66012.4		559	3-VI	75	12705.4		559	3-VI	544	80464
1033	3-VI	127	17648.3		1033	3-VI	614	94668.2		561	3-VI	90	12393.5		561	3-VI	536	83918.3
1029	3-VI	101	14178		1029	3-VI	638	85928.4		751	3-VI	81	11477		751	3-VI	681	97625.1
641	3-VI	110	16970.6		641	3-VI	609	96555.3		752	3-VI	88	14158.4		752	3-VI	504	74524.4
668	3-VI	108	20183.2		668	3-VI	596	87526.6		753	3-VI	109	14608.3		753	3-VI	609	86334.6
690	3-VI	143	24911.4		690	3-VI	595	87459.4		754	3-VI	95	15381		754	3-VI	471	68778.1
642	3-VI	133	19418.5		642	3-VI	630	92787.6		755	3-VI	88	10716.9		755	3-VI	441	57317.9
741	3-VI	126	20534.7		741	3-VI	515	71092.5		756	3-VI	84	11723.3		756	3-VI	531	71389.6
										555	3-VI	103	15721.5		555	3-VI	511	72372.6
