# Supplementary material for: A digital 3D reference atlas reveals cellular growth patterns shaping the Arabidopsis ovule
Source: eLife. 2021 Jan 6;10:e63262. doi: 10.7554/eLife.63262 (PMC7787667; doi:10.7554/eLife.63262)
Supplement: Figure 11—source data 1. [file elife-63262-fig11-data1.xlsx]

## Sheet: fig_11
Genotype	Ovule_id	Stage	Periclinal_division	Anticlinal_division	Oblique_periclinal_division	Cell volume of asymmetric enlarged oblique divided cells (µm³)
ino-5	696_A	2-III	6	3	0
ino-5	696_B	2-III	6	2	0
ino-5	1021_A	2-III	5	3	0
ino-5	1021_B	2-III	4	3	0
ino-5	1021_C	2-III	8	1	0
ino-5	1021_D	2-III	4	4	0
ino-5	659_B	2-IV	6	5	0
ino-5	659_A	2-IV	3	7	0
ino-5	657	2-IV	7	6	0
ino-5	660	2-V	3	7	0
ino-5	647	2-V	9	1	0
ino-5	662	2-V	14	1	0
ino-5	695	2-V	12	0	0
ino-5	661	2-V	12	1	0
ino-5	1009	2-V	9	0	0
Col-0	406	2-III	6	3	1
Col-0	473_A	2-III	4	1	3	24;143, 100;51, 159;71
Col-0	474_B	2-III	5	1	3	121;104, 109;78, 194;84
Col-0	603_A	2-III	10	3	2	171;114, 180;72
Col-0	603_C	2-III	6	7	1
Col-0	294_D	2-III	9	4	0
Col-0	404	2-IV	17	0	2
Col-0	405_A	2-IV	12	3	0
Col-0	405_B	2-IV	8	4	3	177;153, 230;156 , 187;111
Col-0	450	2-IV	12	0	1	212;121
Col-0	462	2-IV	14	3	2	145;103, 51;310
